# Supplementary material
Source: PubMed Central journal article supplement (PMC10686049)
Supplement: NIHMS1942232-supplement-1.pdf [file NIHMS1942232-supplement-1.pdf]

**Supplementary Appendix.**

**Table S1. Estimated excess relative risk of circulatory disease in various therapeutically and diagnostically exposed groups, exposed at high doses, with mean dose generally > 0.5 Gy. All data are in relation to underlying cause of death, unless otherwise indicated.**

| Study                                                  | Reference                                             | Average Dose to Heart (Gy) (mean, range) | Persons (person years of follow-up) | Endpoint (mortality unless otherwise indicated)                                                                                       | Excess relative risk Gy <sup>-1</sup> (95% CI) |
|--------------------------------------------------------|-------------------------------------------------------|------------------------------------------|-------------------------------------|---------------------------------------------------------------------------------------------------------------------------------------|------------------------------------------------|
| <b>Therapeutically treated groups</b>                  |                                                       |                                          |                                     |                                                                                                                                       |                                                |
| US Childhood Cancer Survivor Study                     | Mulrooney <i>et al</i> (Mulrooney <i>et al.</i> 2009) | NA (<5 - >35)                            | 14,358 (NA)                         | Congestive heart failure incidence                                                                                                    | 0.084 (0.062, 0.106) <sup>a</sup>              |
|                                                        |                                                       |                                          |                                     | Myocardial infarction incidence                                                                                                       | 0.062 (0.040, 0.084) <sup>a</sup>              |
|                                                        |                                                       |                                          |                                     | Pericardial disease incidence                                                                                                         | 0.091 (0.068, 0.115) <sup>a</sup>              |
|                                                        |                                                       |                                          |                                     | Valvular heart disease incidence                                                                                                      | 0.109 (0.091, 0.127) <sup>a</sup>              |
| French–UK childhood cancer study                       | Tukenova <i>et al</i> (Tukenova <i>et al.</i> 2010b)  | 11.1 <sup>b</sup> (<1 - >15)             | 4122 (NA)                           | All cardiac disease                                                                                                                   | 0.6 (0.2, 2.5)                                 |
| Institut Gustave Roussy childhood cancer cardiac study | Haddy <i>et al</i> (Haddy <i>et al.</i> 2016)         | 7.5 (<1 - >15)                           | 3162 (82,200)                       | Cardiac disease (ICD9 391, 393-397, 410-413, 420, 423-424, 426-428; ICD10 I05-I09, I20-I25, I30-I32, I44-I50): without anthracyclines | 0.49 (0.26, 1.3)                               |
|                                                        |                                                       |                                          |                                     | Cardiac disease: with anthracyclines                                                                                                  | 0.07 (0.03, 0.13)                              |
| Institut Gustave Roussy childhood cancer stroke study  | El-Fayech <i>et al</i> (El-Fayech <i>et al.</i> 2017) | 7.7 (0 - >40)                            | 3172 (82,500)                       | All stroke (ICD9 430-439)                                                                                                             | 0.24 (0.11, 0.53)                              |
|                                                        |                                                       |                                          |                                     | Ischemic stroke                                                                                                                       | 0.42 (0.16, 1.20)                              |
| Peptic ulcer study                                     | Little <i>et al</i> (Little <i>et al.</i> 2012b)      | 1.01 (0.0 - 6.20)                        | 3600 (76,571.7)                     | Ischemic heart disease ICD9 410-414 using heart dose                                                                                  | 0.102 (0.039, 0.174)                           |
|                                                        |                                                       |                                          |                                     | Ischemic heart disease ICD9 410-414 using thyroid dose                                                                                | 1.696 (0.651, 2.907)                           |
|                                                        |                                                       |                                          |                                     | Ischemic heart disease ICD9 410-414 using kidney dose                                                                                 | 0.033 (0.012, 0.056)                           |
|                                                        |                                                       |                                          |                                     | Ischemic heart disease ICD9 410-414 using pancreas dose                                                                               | 0.020 (0.008, 0.035)                           |
|                                                        |                                                       |                                          |                                     | Cerebrovascular disease ICD9 430-438 using heart dose                                                                                 | 0.028 (-0.085, 0.186)                          |
|                                                        |                                                       |                                          |                                     | Cerebrovascular disease ICD9 430-438 using thyroid dose                                                                               | 0.422 (-1.455, 3.039)                          |
|                                                        |                                                       |                                          |                                     | Cerebrovascular disease ICD9 430-438 using brain dose                                                                                 | 2.649 (-8.912, 18.740)                         |
|                                                        |                                                       |                                          |                                     | All other circulatory disease ICD9 390-409, 415-                                                                                      | 0.050 (-0.053, 0.194)                          |

|                                                                  |                                                             |                                                                  |                          |                                                                                                                                                                                                                                                                                                                                                                                                                                                                                                                                                                                                                                                                                                            |                                                                                                                                                                                                                                                                                                                                                                                                                                                               |
|------------------------------------------------------------------|-------------------------------------------------------------|------------------------------------------------------------------|--------------------------|------------------------------------------------------------------------------------------------------------------------------------------------------------------------------------------------------------------------------------------------------------------------------------------------------------------------------------------------------------------------------------------------------------------------------------------------------------------------------------------------------------------------------------------------------------------------------------------------------------------------------------------------------------------------------------------------------------|---------------------------------------------------------------------------------------------------------------------------------------------------------------------------------------------------------------------------------------------------------------------------------------------------------------------------------------------------------------------------------------------------------------------------------------------------------------|
|                                                                  |                                                             |                                                                  |                          | 429, 439-459 using heart dose<br>All circulatory disease ICD9 390-459 using heart dose                                                                                                                                                                                                                                                                                                                                                                                                                                                                                                                                                                                                                     | 0.082 (0.031, 0.140)                                                                                                                                                                                                                                                                                                                                                                                                                                          |
| Nordic breast cancer case-control study                          | Darby <i>et al</i> (Darby <i>et al.</i> 2013)               | 4.9 (0.03 – 27.72) <sup>c</sup><br>3.9 (0.1 – 30.4) <sup>d</sup> | 963 cases, 1205 controls | Ischemic heart disease incidence ICD10 I20-I25                                                                                                                                                                                                                                                                                                                                                                                                                                                                                                                                                                                                                                                             | 0.074 (0.029, 0.145) <sup>c</sup><br>0.084 (0.036, 0.159) <sup>d</sup>                                                                                                                                                                                                                                                                                                                                                                                        |
| Netherlands Hodgkin lymphoma valvular disease case-control study | Cutter <i>et al</i> (Cutter <i>et al.</i> 2015)             | 30.7 <sup>e</sup> (0 – >40)                                      | 89 cases, 200 controls   | Valvular heart disease incidence                                                                                                                                                                                                                                                                                                                                                                                                                                                                                                                                                                                                                                                                           | 0.141 (0.024, 1.013) <sup>d,f</sup>                                                                                                                                                                                                                                                                                                                                                                                                                           |
| Netherlands Hodgkin lymphoma heart disease case-control study    | van Nimwegen <i>et al</i> (van Nimwegen <i>et al.</i> 2016) | 20.4 <sup>g</sup> (0 – >35)                                      | 325 cases, 1204 controls | Coronary heart disease incidence                                                                                                                                                                                                                                                                                                                                                                                                                                                                                                                                                                                                                                                                           | 0.074 (0.033, 0.148) <sup>d</sup>                                                                                                                                                                                                                                                                                                                                                                                                                             |
| Netherlands Hodgkin lymphoma heart failure case-control study    | van Nimwegen <i>et al</i> (van Nimwegen <i>et al.</i> 2017) | 20.9 (0 – >33)                                                   | 91 cases, 278 controls   | Heart failure CTCAE grades 3-4                                                                                                                                                                                                                                                                                                                                                                                                                                                                                                                                                                                                                                                                             | 0.038 (-0.001, 0.146) <sup>h</sup>                                                                                                                                                                                                                                                                                                                                                                                                                            |
| Netherlands breast cancer case-control study                     | Jacobse <i>et al</i> (Jacobse <i>et al.</i> 2019)           | 8.5 (4.3 – 15.0)                                                 | 183 cases, 183 controls  | Myocardial infarction incidence                                                                                                                                                                                                                                                                                                                                                                                                                                                                                                                                                                                                                                                                            | 0.064 (0.013, 0.160)                                                                                                                                                                                                                                                                                                                                                                                                                                          |
| <b>Diagnostically exposed groups</b>                             |                                                             |                                                                  |                          |                                                                                                                                                                                                                                                                                                                                                                                                                                                                                                                                                                                                                                                                                                            |                                                                                                                                                                                                                                                                                                                                                                                                                                                               |
| Canadian and Massachusetts TB fluoroscopy cohorts                | Tran <i>et al</i> (Tran <i>et al.</i> 2017)                 | 0.18 (0, 0.50) [ $<0.5$ Gy] / 1.16 (0, 27.77) [total]            | 77,275 (1,945,041)       | All circulatory disease ICD9 390-459<br>All circulatory disease ICD9 390-459: $<0.5$ Gy<br>Ischemic heart disease ICD9 410-414<br>Ischemic heart disease ICD9 410-414: $<0.5$ Gy<br>Cerebrovascular disease ICD9 430-438<br>Cerebrovascular disease ICD9 430-438: $<0.5$ Gy<br>Hypertensive heart disease ICD9 401-405<br>Hypertensive heart disease ICD9 401-405: $<0.5$ Gy<br>Heart disease apart from hypertensive and IHD ICD9 390-400, 406-410<br>Heart disease apart from hypertensive and IHD ICD9 390-400, 406-410: $<0.5$ Gy<br>All circulatory disease apart from heart and cerebrovascular ICD9 439-459<br>All circulatory disease apart from heart and cerebrovascular ICD9 439-459: $<0.5$ Gy | -0.024 (-0.042, -0.005) <sup>i</sup><br>0.246 (0.036, 0.469) <sup>i</sup><br>-0.037 (-0.060, -0.013) <sup>i</sup><br>0.268 (0.003, 0.552)<br>-0.014 (-0.067, 0.044) <sup>i</sup><br>0.441 (-0.119, 1.090) <sup>i</sup><br>-0.035 (-0.152, 0.153) <sup>i</sup><br>1.121 (-0.351, 3.228) <sup>i</sup><br>-0.010 (-0.064, 0.043) <sup>i</sup><br>-0.226 (-0.679, 0.307) <sup>i</sup><br>0.055 (-0.028, 0.164) <sup>i</sup><br>0.507 (-0.322, 1.541) <sup>i</sup> |

<sup>a</sup>estimate derived by fitting a linear model by weighted least squares, applied to the aggregate data provided in Table 5 of Mulrooney *et al.* (Mulrooney *et al.* 2009). Average cardiac doses of 0, 2.5, 10, 25, and 40 Gy were assumed for the respective groups with the following specified ranges of cardiac doses: 0, 0-4, 5-14, 15-34 Gy,  $\geq 35$  Gy.

<sup>b</sup>mean dose to heart in 21 persons who died of cardiovascular disease.

<sup>c</sup>cumulative mean dose to heart.

<sup>d</sup>equivalent dose to heart in 2 Gy fractions (EQD2).

<sup>e</sup>mean EQD2 dose to heart valves in controls.

<sup>f</sup>estimate derived by fitting a linear binomial odds model to aggregate numbers of cases and controls, and employing the median EQD2 heart-valve doses by dose group given in Table 4 of Cutter *et al.* (Cutter *et al.* 2015): see Appendix A.

<sup>g</sup>mean EQD2 dose to heart in controls.

<sup>h</sup>estimate derived by fitting a linear binomial odds model to aggregate numbers of cases and controls, and assuming mean heart doses of 0, 16, 23, 28, 33 Gy for the 0, 1-20, 21-25, 26-30,  $\geq 31$  Gy mean heart dose groups given in Table 2 of van Nimwegen *et al.* (van Nimwegen *et al.* 2017).

<sup>i</sup>based on 5-year lagged lung dose.

**Table S2. Estimated excess relative risks of circulatory disease in the Japanese atomic bomb survivors and in other groups with moderate- or low-dose radiation exposure, with mean dose generally < 0.5 Gy.** (Adapted from Little and Lipshultz (Little and Lipshultz 2015). All data are in relation to underlying cause of death, unless otherwise indicated.

| Cohort/Study                                               | Reference                                      | Mean (range) heart/brain dose, Gy                                      | Persons (person years of follow-up)              | Endpoint (mortality unless otherwise indicated)                             | Excess relative risk Gy <sup>-1</sup> (95% CI) |
|------------------------------------------------------------|------------------------------------------------|------------------------------------------------------------------------|--------------------------------------------------|-----------------------------------------------------------------------------|------------------------------------------------|
| <b>Japanese atomic bomb survivors</b>                      |                                                |                                                                        |                                                  |                                                                             |                                                |
| Japanese atomic bomb survivors 1950-2008                   | Takahashi <i>et al.</i> (Takahashiet al. 2017) | 0.1 (0 - 4) <sup>a</sup>                                               | 86,600 (3,462,847)                               | Heart disease (ICD10 I05–I08, I09.1, I11, I13, I20–25,I34–I39, I50) overall | 0.140 (0.060, 0.220)                           |
|                                                            |                                                |                                                                        |                                                  | Ischemic heart disease (ICD10 I20-I25)                                      | 0.030 (-0.080, 0.150)                          |
|                                                            |                                                |                                                                        |                                                  | Myocardial infarction (ICD10 I21-I23)                                       | 0.020 (-0.130, 0.200)                          |
|                                                            |                                                |                                                                        |                                                  | Other ischemic heart disease (ICD10 I20, I24-I25)                           | 0.040 (-0.120, 0.220)                          |
|                                                            |                                                |                                                                        |                                                  | Valvular heart disease (ICD10 I05–I08, I09.1, I34–I39)                      | 0.450 (0.130, 0.850)                           |
|                                                            |                                                |                                                                        |                                                  | Rheumatic valvular heart disease (ICD10 I05–I08, I09.1)                     | 0.960 (0.280, 1.920)                           |
|                                                            |                                                |                                                                        |                                                  | Non-rheumatic valvular heart disease (I34–I39)                              | 0.240 (-0.080, 0.680)                          |
|                                                            |                                                |                                                                        |                                                  | Hypertensive organ damage (ICD10 I11-I13)                                   | 0.360 (0.100, 0.680)                           |
| Japanese atomic bomb survivors                             | Yamada <i>et al.</i> (Yamadaet al. 2004)       | 0.1 (0 - 4) <sup>b</sup>                                               | 10,339 (n.a.)                                    | Heart failure (ICD10 I50)                                                   | 0.210 (0.070, 0.370)                           |
|                                                            |                                                |                                                                        |                                                  | Hypertension incidence, 1958-1998 (ICD9 401)                                | 0.05 (-0.01, 0.10) <sup>c</sup>                |
|                                                            |                                                |                                                                        |                                                  | Hypertensive heart disease incidence, 1958-1998 (ICD9 402, 404)             | -0.01 (-0.09, 0.09) <sup>c</sup>               |
|                                                            |                                                |                                                                        |                                                  | Ischemic heart disease incidence, 1958-1998 (ICD9 410-414)                  | 0.05 (-0.05, 0.16) <sup>c</sup>                |
|                                                            |                                                |                                                                        |                                                  | Myocardial infarction incidence, 1964-1998 (ICD9 410)                       | 0.12 (-0.16, 0.60) <sup>c</sup>                |
|                                                            |                                                |                                                                        |                                                  | Occlusion incidence, 1958-1998 (ICD9 433, 434)                              | 0.06 (-0.11, 0.30) <sup>c</sup>                |
|                                                            |                                                |                                                                        |                                                  | Aortic aneurysm incidence, 1958-1998 (ICD9 441, 442)                        | 0.02 (-0.22, 0.41) <sup>c</sup>                |
| Stroke incidence, 1958-1998 (ICD9 430, 431, 433, 434, 436) | 0.07 (-0.08, 0.24) <sup>c</sup>                |                                                                        |                                                  |                                                                             |                                                |
| <b>Occupational studies</b>                                |                                                |                                                                        |                                                  |                                                                             |                                                |
| Mayak workers                                              | Moseeva <i>et al.</i> (Moseevaet al. 2014)     | 0.62 ± 0.80 (males) <sup>d</sup><br>0.51 ± 0.68 (females) <sup>d</sup> | 22,377 (447,281)                                 | Ischemic heart disease morbidity (ICD9 410-414)                             | 0.14 (0.08, 0.21) <sup>e</sup>                 |
|                                                            |                                                |                                                                        |                                                  | Ischemic heart disease morbidity (ICD9 410-414)                             | 0.14 (0.08, 0.21) <sup>f</sup>                 |
|                                                            |                                                |                                                                        |                                                  | Ischemic heart disease morbidity (ICD9 410-414)                             | 0.16 (0.10, 0.24) <sup>g</sup>                 |
|                                                            |                                                |                                                                        |                                                  | Ischemic heart disease mortality (ICD9 410-414)                             | 0.05 (-0.01, 0.13) <sup>e</sup>                |
|                                                            | Azizova <i>et al.</i> (Azizovaet al. 2015b)    | 22,377 (836,048)                                                       | Ischemic heart disease mortality (ICD9 410-414)  | 0.05 (-0.01, 0.13) <sup>f</sup>                                             |                                                |
|                                                            |                                                |                                                                        | Ischemic heart disease mortality (ICD9 410-414)  | 0.05 (-0.01, 0.13) <sup>g</sup>                                             |                                                |
|                                                            |                                                |                                                                        | Cerebrovascular disease morbidity (ICD9 430-438) | 0.497 (0.393, 0.601) <sup>e</sup>                                           |                                                |
|                                                            |                                                |                                                                        | Cerebrovascular disease morbidity (ICD9 430-438) | 0.529 (0.415, 0.642) <sup>f</sup>                                           |                                                |
| 18,856 (341,663)                                           | 18,856 (272,525)                               | Cerebrovascular disease morbidity (ICD9 430-438)                       | 0.572 (0.450, 0.695) <sup>g</sup>                |                                                                             |                                                |
|                                                            |                                                | Cerebrovascular disease mortality (ICD9 430-438)                       | 0.057 (-0.046, 0.161) <sup>e</sup>               |                                                                             |                                                |

|                                                                        |                                                      |                        |                                        |                                                                                      |                                         |                    |
|------------------------------------------------------------------------|------------------------------------------------------|------------------------|----------------------------------------|--------------------------------------------------------------------------------------|-----------------------------------------|--------------------|
|                                                                        |                                                      |                        |                                        | Cerebrovascular disease mortality (ICD9 430-438)                                     | 0.064 (-0.042, 0.170) <sup>f</sup>      |                    |
|                                                                        |                                                      |                        |                                        | Cerebrovascular disease mortality (ICD9 430-438)                                     | 0.076 (-0.033, 0.186) <sup>g</sup>      |                    |
| Mayak nuclear workers lower extremity arterial disease                 | Azizova <i>et al.</i> (Azizova <i>et al.</i> 2016)   | 0.51 ± 0.72            | 22,377 (512,801)                       | Lower extremity arterial disease morbidity (ICD9 440.2)                              | 0.27 (0.11, 0.48)                       |                    |
| Mayak part of combined nuclear worker study                            | Azizova <i>et al.</i> (Azizova <i>et al.</i> 2018)   | 0.52 (0, 8.4)          | 22,734 (842,538)                       | Circulatory disease (ICD10 I00-I99)                                                  | 0.04 (-0.00, 0.09)                      |                    |
|                                                                        |                                                      |                        |                                        | Ischemic heart disease (ICD10 I20-I25)                                               | 0.06 (0.01, 0.13)                       |                    |
| Sellafield part of combined nuclear worker study                       | Azizova <i>et al.</i> (Azizova <i>et al.</i> 2018)   | 0.07 (0, 1.88)         | 23,443 (602,311)                       | Circulatory disease (ICD10 I00-I99)                                                  | 0.42 (0.12, 0.78)                       |                    |
|                                                                        |                                                      |                        |                                        | Ischemic heart disease (ICD10 I20-I25)                                               | 0.53 (0.14, 1.00)                       |                    |
|                                                                        |                                                      |                        |                                        | Cerebrovascular disease (ICD10 I60-I69)                                              | 0.05 (-0.46, 0.79)                      |                    |
| 3 <sup>rd</sup> Analysis of UK National Registry for Radiation Workers | Muirhead <i>et al.</i> (Muirhead <i>et al.</i> 2009) | 0.0249 (<0.01 - >0.4)  | 174,541 (3.9 x 10 <sup>6</sup> )       | All circulatory disease (ICD9 390-459)                                               | 0.251 (-0.01, 0.54) <sup>f</sup>        |                    |
|                                                                        |                                                      |                        |                                        | Circulatory disease not strongly related to smoking (ICD9 390-409, 415-440, 442-459) | 0.280 (-0.19, 0.85) <sup>f</sup>        |                    |
|                                                                        |                                                      |                        |                                        | Aortic aneurysm (ICD9 441)                                                           | -0.132 (-1.29, 1.92) <sup>f</sup>       |                    |
|                                                                        |                                                      |                        |                                        | Ischemic heart disease (ICD9 410-414)                                                | 0.259 (-0.05, 0.61) <sup>f</sup>        |                    |
|                                                                        |                                                      |                        |                                        | Cerebrovascular disease (ICD9 430-438)                                               | 0.161 (-0.42, 0.91) <sup>f</sup>        |                    |
| French nuclear workers                                                 | Leuraud <i>et al.</i> (Leuraud <i>et al.</i> 2017)   | 0.0184 ± 0.0407        | 59,004 (1,469,949)                     | Circulatory disease (ICD10 G45, I00-I99)                                             | 0.31 (-0.71, 1.52)                      |                    |
|                                                                        |                                                      |                        |                                        | Ischemic heart disease (ICD10 I20-I25)                                               | 1.06 (-0.62, 3.23)                      |                    |
|                                                                        |                                                      |                        |                                        | Cerebrovascular disease (G45.0–G45.2, G45.8–G45.9, I60-I69)                          | 0.65 (-1.65, 4.01)                      |                    |
| French nuclear fuel cycle workers                                      | Zhivin <i>et al.</i> (Zhivinet <i>et al.</i> 2018)   | 0.002 (0, <0.027)      | 102 cases and 416 controls             | Circulatory disease (ICD10 I00-I99)                                                  | 10 (-20, 40)                            |                    |
|                                                                        |                                                      |                        |                                        | 44 cases                                                                             | Ischemic heart disease (ICD10 I20-I25)  | 0 (-50, 40)        |
|                                                                        |                                                      |                        |                                        | 31 cases                                                                             | Cerebrovascular disease (ICD10 I60-I69) | -10 (-50, 30)      |
|                                                                        |                                                      |                        |                                        |                                                                                      | Cerebrovascular disease (ICD10 I60-I69) | 0.00 (-0.06, 0.08) |
| French uranium miners case-control study                               | Drubay <i>et al.</i> (Drubay <i>et al.</i> 2015)     | 0.0434 (0 - 0.471)     | 76 cases, 237 counter-matched controls | All circulatory disease (ICD10 I00-I99)                                              | 0.4 (-1.6, 2.9) <sup>h</sup>            |                    |
|                                                                        |                                                      |                        |                                        | Ischemic heart disease (ICD10 I20-I25)                                               | -1.0 (-3.9, 3.3) <sup>h</sup>           |                    |
|                                                                        |                                                      |                        |                                        | Cerebrovascular disease (ICD10 I60-I69)                                              | 2.4 (-0.6, 11.4) <sup>h</sup>           |                    |
| German uranium miner study                                             | Kreuzer <i>et al.</i> (Kreuzer <i>et al.</i> 2013)   | 0.047 (0.0002 – 0.909) | 58,982 (2,180,639)                     | All circulatory disease (ICD10 I00-I99)                                              | -0.13 (-0.38, 0.12) <sup>f</sup>        |                    |
|                                                                        |                                                      |                        |                                        | Ischemic heart disease (ICD10 I20-I25)                                               | -0.03 (-0.38, 0.32) <sup>f</sup>        |                    |
|                                                                        |                                                      |                        |                                        | Cerebrovascular disease (ICD10 I60-I69)                                              | 0.44 (-0.16, 1.04) <sup>f</sup>         |                    |
| US nuclear workers                                                     | Schubauer-Berigan <i>et al.</i> (Schubauer-          | 0.0202 (0 - >0.6)      | 119,195 (2,664,782)                    | Cardiovascular disease (ICD9 390-398, 402, 404, 410-414, 420-429)                    | 2.6 (-25, 32) <sup>f</sup>              |                    |

|                                               |                                                     |                             |                                  |                                                                                 |                                    |
|-----------------------------------------------|-----------------------------------------------------|-----------------------------|----------------------------------|---------------------------------------------------------------------------------|------------------------------------|
|                                               | Beriganet al. 2015)                                 |                             |                                  |                                                                                 |                                    |
| Chernobyl emergency workers                   | Kashcheev <i>et al.</i><br>(Kashcheevet al. 2016)   | 0.161 (0.0001 - 1.24)       | 53,772 (958,540.5)               | Cerebrovascular disease (ICD10 I60-I69) morbidity after no diabetes             | 0.35 (0.18, 0.53)                  |
|                                               |                                                     |                             |                                  | Cerebrovascular disease (ICD10 I60-I69) morbidity after diabetes                | 1.29 (0.63, 1.94)                  |
|                                               |                                                     |                             |                                  | Cerebrovascular disease (ICD10 I60-I69) morbidity after no atherosclerosis      | 0.43 (0.25, 0.62)                  |
|                                               |                                                     |                             |                                  | Cerebrovascular disease (ICD10 I60-I69) morbidity after atherosclerosis         | 0.50 (0.09, 0.90)                  |
|                                               |                                                     |                             |                                  | Cerebrovascular disease (ICD10 I60-I69) morbidity after no hypertensive disease | 0.38 (0.08, 0.68)                  |
|                                               |                                                     |                             |                                  | Cerebrovascular disease (ICD10 I60-I69) morbidity after hypertensive disease    | 0.48 (0.27, 0.68)                  |
|                                               |                                                     |                             |                                  | Cerebrovascular disease (ICD10 I60-I69) morbidity after no IHD                  | 0.41 (0.14, 0.68)                  |
|                                               |                                                     |                             |                                  | Cerebrovascular disease (ICD10 I60-I69) morbidity after IHD                     | 0.47 (0.25, 0.69)                  |
|                                               |                                                     |                             |                                  | Cerebrovascular disease (ICD10 I60-I69) morbidity after no concomitant disease  | 0.19 (-0.99, 1.37)                 |
|                                               |                                                     |                             |                                  | Cerebrovascular disease (ICD10 I60-I69) morbidity                               | 0.45 (0.28, 0.62)                  |
| Chernobyl emergency workers                   | Kashcheev <i>et al.</i><br>(Kashcheevet al. 2017)   | 0.161 (0.0001, 1.42)        | 53,772 (940,204.5)               | Circulatory disease (ICD10 I00-I99)                                             | 0.44 (0.16, 0.74)                  |
| International Nuclear Workers Study (INWORKS) | Gillies <i>et al.</i><br>(Gillieset al. 2017)       | 0.0252 (0, 1.932)           | 308,297 (8.2 x 10 <sup>6</sup> ) | Circulatory disease (ICD10 I00-I99)                                             | 0.22 (0.08, 0.37) <sup>l</sup>     |
|                                               |                                                     |                             |                                  | Ischemic heart disease (I20-I25)                                                | 0.18 (0.004, 0.36) <sup>l</sup>    |
|                                               |                                                     |                             |                                  | Acute myocardial infarction (I21)                                               | 0.26 (0.03, 0.51) <sup>l</sup>     |
|                                               |                                                     |                             |                                  | Chronic ischemic heart disease (I25)                                            | 0.07 (-0.19, 0.36) <sup>l</sup>    |
|                                               |                                                     |                             |                                  | Cerebrovascular disease (I60-I69)                                               | 0.50 (0.12, 0.94) <sup>l</sup>     |
| <b>Environmental studies</b>                  |                                                     |                             |                                  |                                                                                 |                                    |
| Techa River study                             | Krestinina <i>et al.</i><br>(Krestininaet al. 2013) | 0.035 (0-0.51) <sup>k</sup> | 29,735 (901,563)                 | All circulatory disease mortality (ICD9 390-459)                                | 0.18 (-0.13, 0.52) <sup>j, e</sup> |
|                                               |                                                     |                             |                                  | All circulatory disease mortality (ICD9 390-459)                                | 0.24 (-0.08, 0.59) <sup>j, f</sup> |
|                                               |                                                     |                             |                                  | All circulatory disease mortality (ICD9 390-459)                                | 0.36 (0.02, 0.75) <sup>j, g</sup>  |
|                                               |                                                     |                             |                                  | Ischemic heart disease mortality (ICD9 410-414)                                 | 0.26 (-0.22, 0.81) <sup>j, e</sup> |
|                                               |                                                     |                             |                                  | Ischemic heart disease mortality (ICD9 410-414)                                 | 0.40 (-0.11, 0.99) <sup>j, f</sup> |
|                                               |                                                     |                             |                                  | Ischemic heart disease mortality (ICD9 410-414)                                 | 0.56 (0.01, 1.19) <sup>j, g</sup>  |
| Semipalatinsk nuclear test study              | Grosche <i>et al.</i><br>(Groscheet al.             | 0.09 (0-0.63)               | 19,545 (582,656)                 | Heart disease (ICD9 410-429): all settlements                                   | 3.22 (2.33, 4.10) <sup>f</sup>     |
|                                               |                                                     |                             |                                  | Heart disease (ICD9 410-429): exposed settlements                               | 0.06 (-0.39, 0.52) <sup>f</sup>    |

---

2011)

|                                                            |                                  |
|------------------------------------------------------------|----------------------------------|
| Stroke (ICD9 430-438): all settlements                     | 2.96 (1.77, 4.14) <sup>f</sup>   |
| Stroke (ICD9 430-438): exposed settlements                 | -0.06 (-0.65, 0.54) <sup>f</sup> |
| Cardiovascular disease (ICD9 390-459): all settlements     | 3.15 (2.48, 3.81) <sup>f</sup>   |
| Cardiovascular disease (ICD9 390-459): exposed settlements | 0.02 (-0.32, 0.37) <sup>f</sup>  |

---

CI, Confidence Interval; ICD, International Classification of Diseases

<sup>a</sup> Analysis based on colon dose.

<sup>b</sup> Analysis using underlying or contributing cause of death.

<sup>c</sup> Analysis based on stomach dose, derived from Table 3 of Yamada *et al.* (Yamada *et al.* 2004) with smoking and drinking in the stratification.

<sup>d</sup> Risk estimates in relation to cumulative whole body external gamma dose; doses given here are from Moseeva *et al.* (Moseeva *et al.* 2014).

<sup>e</sup> Assuming a lag period of 5 years.

<sup>f</sup> Assuming a lag period of 10 years.

<sup>g</sup> Assuming a lag period of 15 years.

<sup>h</sup> Assuming a lag period of 0 years.

<sup>i</sup> 90% CI

<sup>j</sup> Analysis based on dose to muscle.
